# Supplementary material for: Assessment of Pharmacological Potential of Novel Exopolysaccharide Isolated from Marine Kocuria sp. Strain AG5: Broad-Spectrum Biological Investigations
Source: MDPI journal article supplement (doi:10.3390/life12091387), 2022-09-06
Supplement: s1 [file s1]

## **Supplementary Data**

### **Assessment of Pharmacological Potential of Novel Exopolysaccharide Isolated from Marine *Kocuria* sp. Strain AG5: Broad-Spectrum Biological Investigations**

Samar Zuhair Alshawwa <sup>1</sup>, Khalid S. Alshallash <sup>2</sup>, Ahmed Ghareeb <sup>3</sup>, Ahmed M. Elazzazy <sup>4</sup>, Mohamed Sharaf <sup>5</sup>, Afaf Alharthi <sup>6</sup>, Fathy Elsayed Abdelgawad <sup>7,8</sup>, Dalia El-Hossary <sup>9</sup>, Mariusz Jaremko <sup>10</sup>, Abdul-Hamid Emwas <sup>11</sup> and Yosra A. Helmy <sup>12,13,\*</sup>

**Table S1.** Physiological Characteristics of *Kocuria* Sp. strain AG5.

| <b>Physiological characteristics</b> | <b><i>Kocuria</i> sp. strain AG5</b> |
|--------------------------------------|--------------------------------------|
| Catalase                             | +                                    |
| Citrate                              | +                                    |
| Coagulase                            | -                                    |
| Indol                                | -                                    |
| MR(Methylred)                        | -                                    |
| VP(Voges Proskauer)                  | +                                    |
| Oxidase                              | -                                    |
| Urease                               | +                                    |
| Nitrate reduction                    | -                                    |
| Glucose                              | +                                    |
| Lactose                              | -                                    |
| Sucrose                              | +                                    |
| Mannose                              | +                                    |

**Table S2.** Culture and Morphological Characteristics of *Kocuria* sp. strain

| <i>Kocuria</i> sp.<br>strain | Shape and Culture Characteristics                                                                                                                                           |
|------------------------------|-----------------------------------------------------------------------------------------------------------------------------------------------------------------------------|
| AG5                          | Gram positive cocci, Large, Yellow, Rough, Dry, Convex, short chains, non-capsulated, non-spore-forming, non-motile, non-acid fast and non-hemolytic colonies on blood agar |

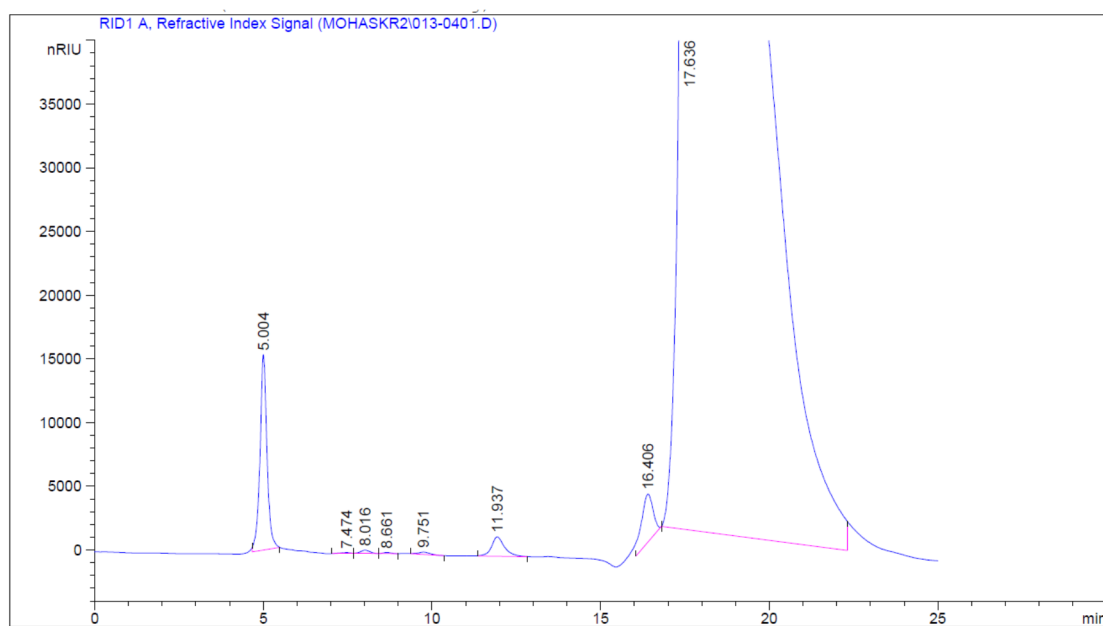

**Figure S1.** HPLC analysis of the EPSR5.

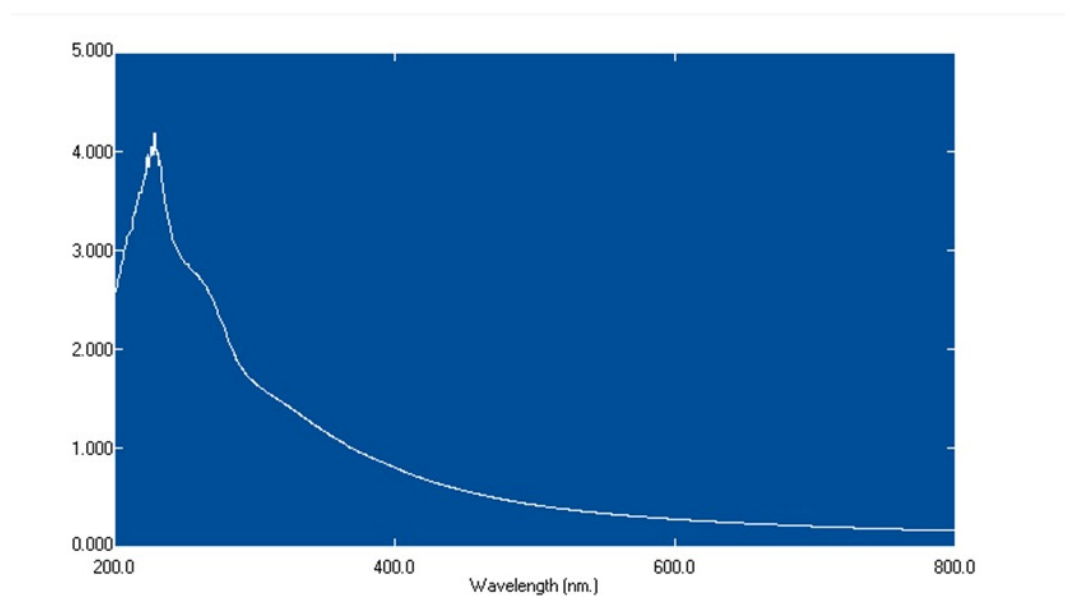

**Figure S2.** U.V Spectrum of EPSR5 isolated from *Kocuria Sp.* strain AG5.

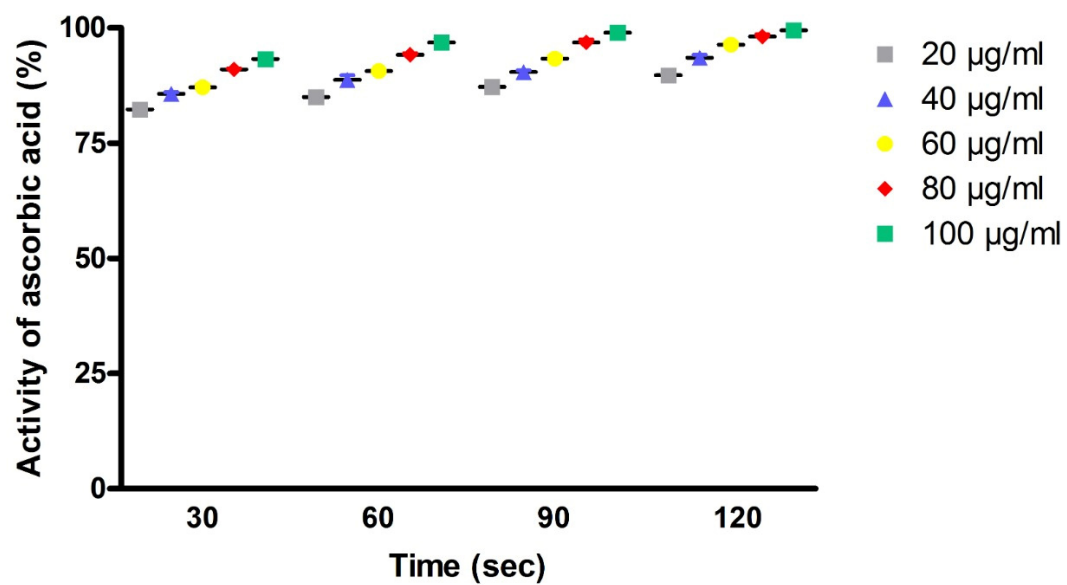

**Figure S3.** The activity of ascorbic acid to scavenge the free radical of DPPH at different time intervals.

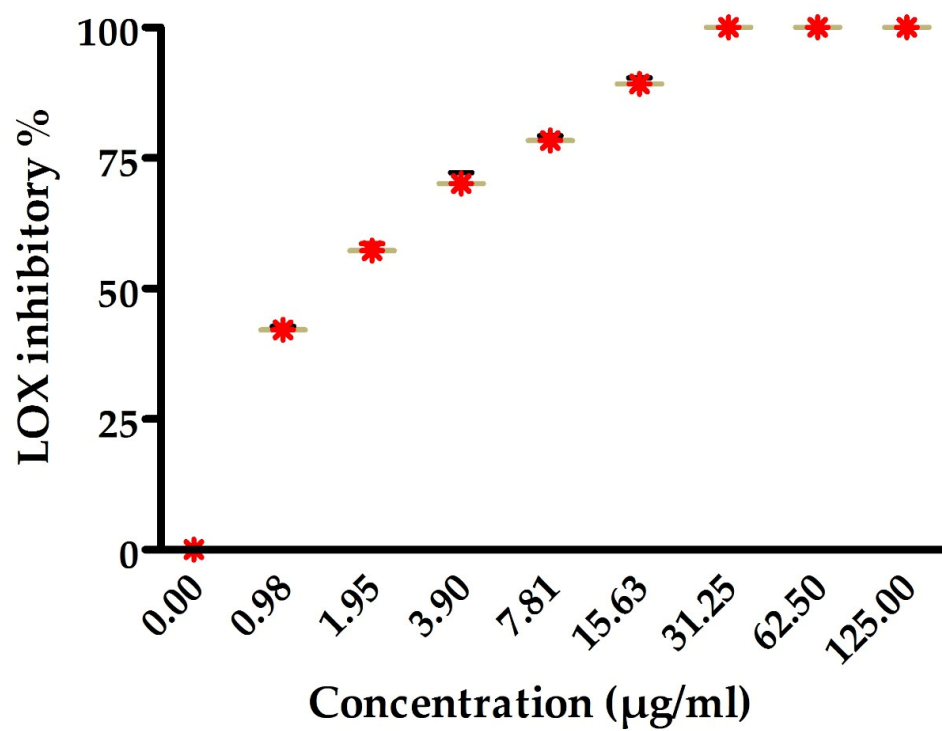

**Figure S4.** The inhibitory activity of ibuprofen against 5-LOX enzymatic activity.

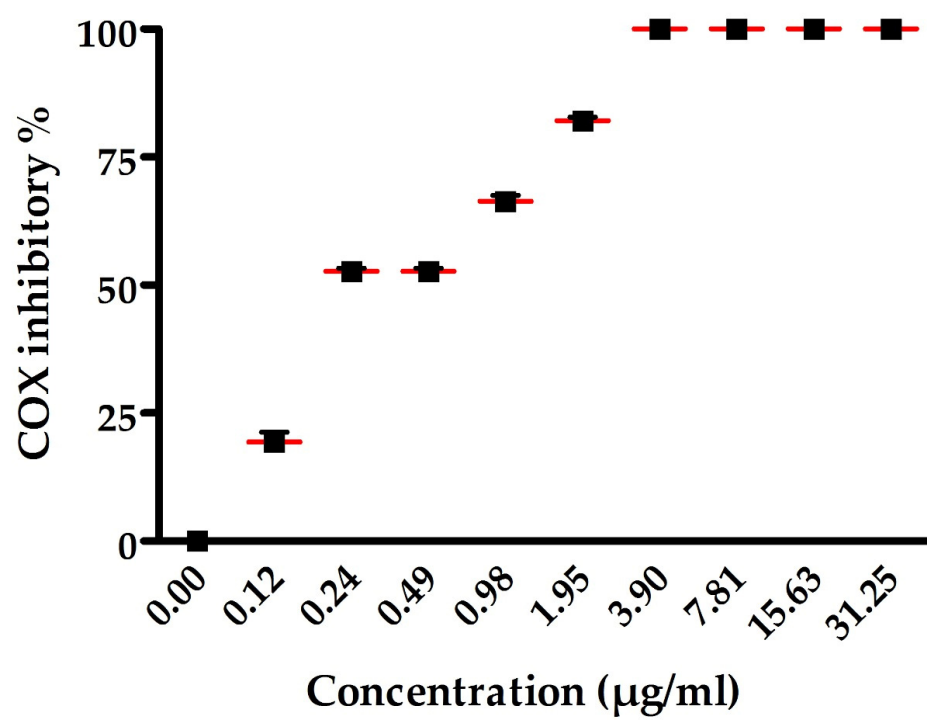

**Figure S5.** The inhibitory activity of celecoxib against COX-2 enzymatic activity.



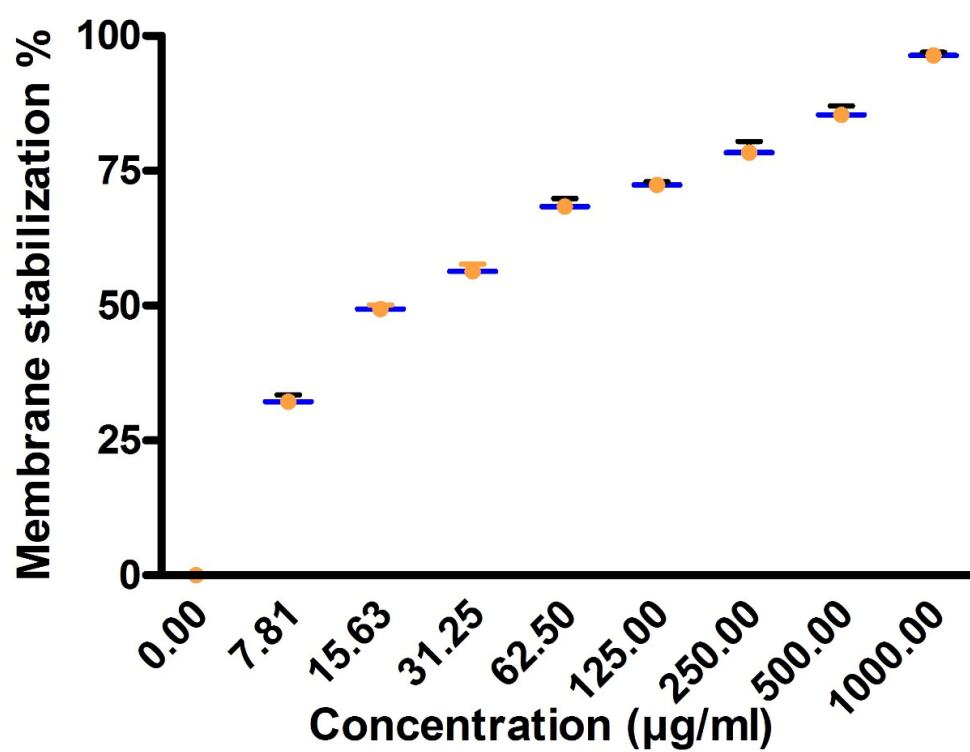

**Figure S6.** The inhibitory activity of indomethacin against hemolysis activity (membrane stability).

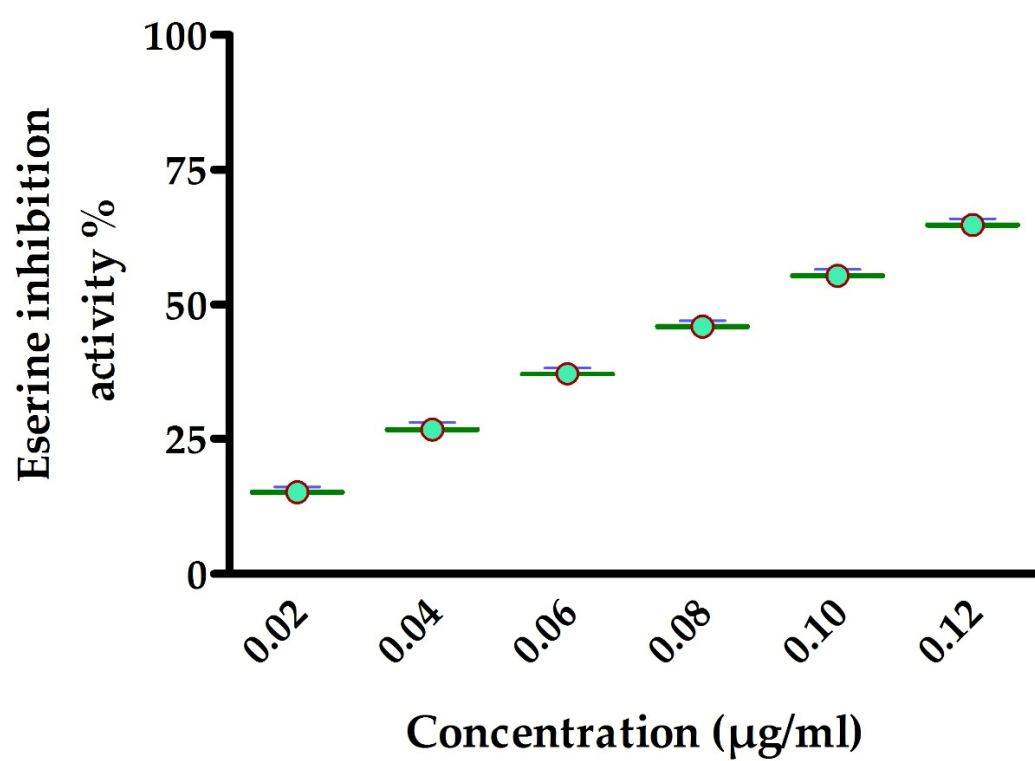

**Figure S7.** The inhibitory activity of Eserine against acetylcholinesterase activity.
